# Supplementary material for: High-voltage ionic liquid-based flexible solid polymer electrolyte for high-performance Li-ion batteries
Source: Royal Society of Chemistry journal article supplement (doi:10.1039/d3se00417a), 2023-01-01
Supplement: d3se00417a1.pdf [file d3se00417a1.pdf]

## Supporting Information

### High Voltage Ionic Liquid Based Flexible Solid Polymer Electrolyte for high-Performance Li-Ion battery

Rushikesh B. Kale, Sahebrao S. More, Nageshwar D. Khupse, Ramchandra S. Kalubarme,  
Milind V. Kulkarni, Sunit B. Rane, Bharat B. Kale\*

†Centre for Materials for Electronic Technology (C-MET), Ministry of Electronics and  
Information Technology (MeitY), Govt. of India, Panchawati, Off Pashan Road, Pune 411008,  
India.

E-mail: [bbkale@cmet.gov.in](mailto:bbkale@cmet.gov.in), [bbkale1@gmail.com](mailto:bbkale1@gmail.com)

#### Experimental Section:

The details of loading of cathode with C-rates are given below

**Table S1:** The details of loading of cathode with C-rates

| Cell Configuration | LFP loading<br>(mg) | 0.1C<br>(mA) | 0.2C<br>(mA) | 0.5C<br>(mA) | 1C<br>(mA) |
|--------------------|---------------------|--------------|--------------|--------------|------------|
| Li/SPE-IL-II/LFP   | 3.008               | 0.05113      | 0.1022       | 0.2556       | 0.5113     |

**Table S2:** The comparative literature data on the reported system

| S. No | Composition         | Ionic Conductivity (S/cm) | Temp             | Reference                                                                                                                                                                                                                               |
|-------|---------------------|---------------------------|------------------|-----------------------------------------------------------------------------------------------------------------------------------------------------------------------------------------------------------------------------------------|
| 1     | PEO+PTFE            | $6.62 \times 10^{-8}$     | Room Temperature | Jokhakar, Deep A., et al. "All-solid-state Li-metal batteries: role of blending PTFE with PEO and LiTFSI salt as a composite electrolyte with enhanced thermal stability." <i>Sustainable Energy Fuels</i> , <b>2020</b> , 4, 2229-2235 |
| 2     | PEO+HEMC            | $1.30 \times 10^{-4}$     | Room Temperature | Wu, Hailong, et al. "A branched cellulose-reinforced composite polymer electrolyte with upgraded ionic conductivity for anode stabilized solid-state Li metal batteries." <i>Sustainable Energy Fuels</i> , <b>2019</b> , 3, 2642-2656. |
| 3     | VBIIm+PEG DA        | $1.4 \times 10^{-4}$      | Room Temperature | Zhang, Fengrui, et al. "Highly conductive polymeric ionic liquid electrolytes for ambient-temperature solid-state lithium batteries." <i>ACS Appl. Mater. Interfaces</i> <b>2020</b> , 12, 23774–23780                                  |
| 4     | CTA+PEGMA+EMIM TFSI | $1.24 \times 10^{-3}$     | Room Temperature | Our System                                                                                                                                                                                                                              |

**<sup>1</sup>H NMR:**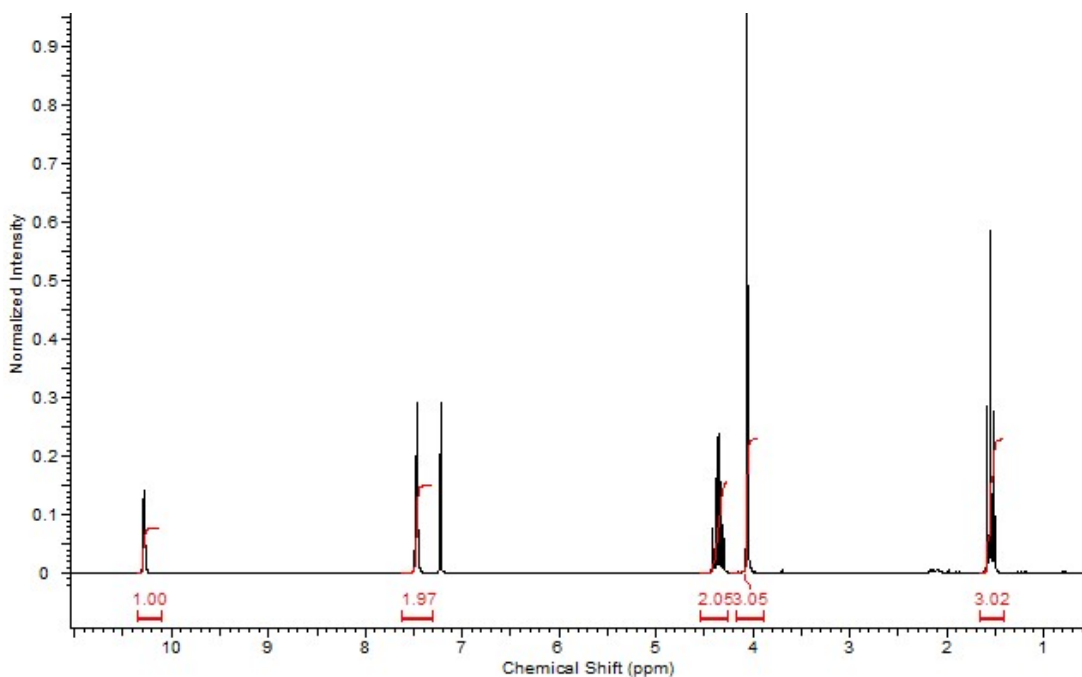

**Figure S1:**  $^1\text{H}$  NMR for [EMIM][TFSI] 1-Ethyl-3-methyl-imidazolium Bis(trifluoromethanesulfonyl) imide ionic liquids

### Nyquist Plot of SPE

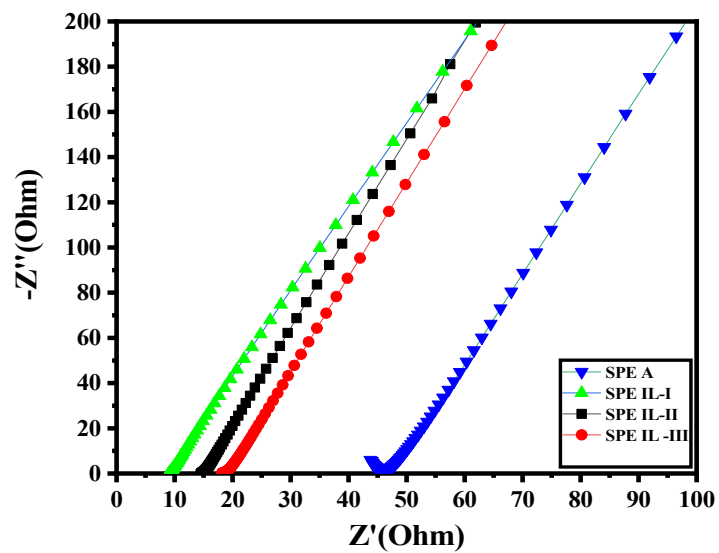

**Figure S2:** Impedance plot of SPE membranes

### Flame Retardant Test

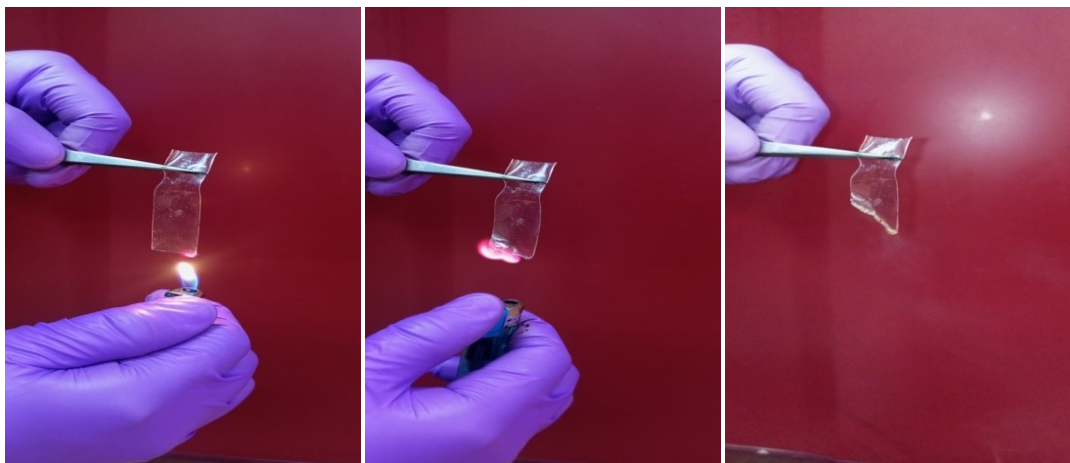

**Figure S3:** Flame Test of SPE-IL-II

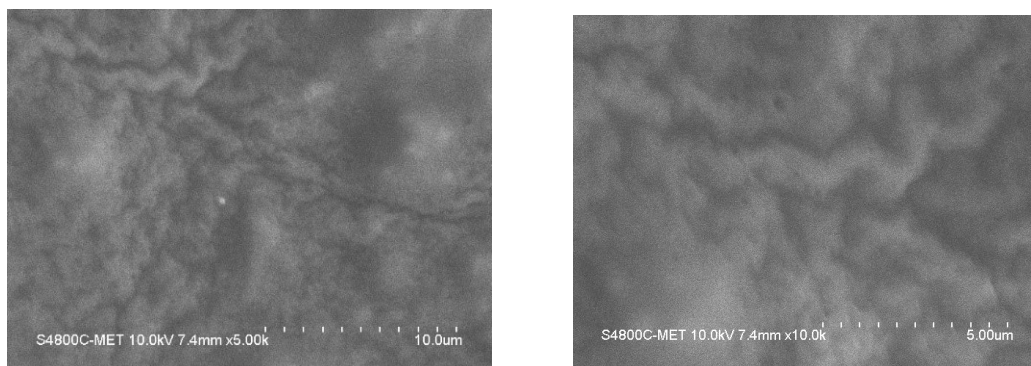

**Figure S4:** FESEM study after charge – discharge

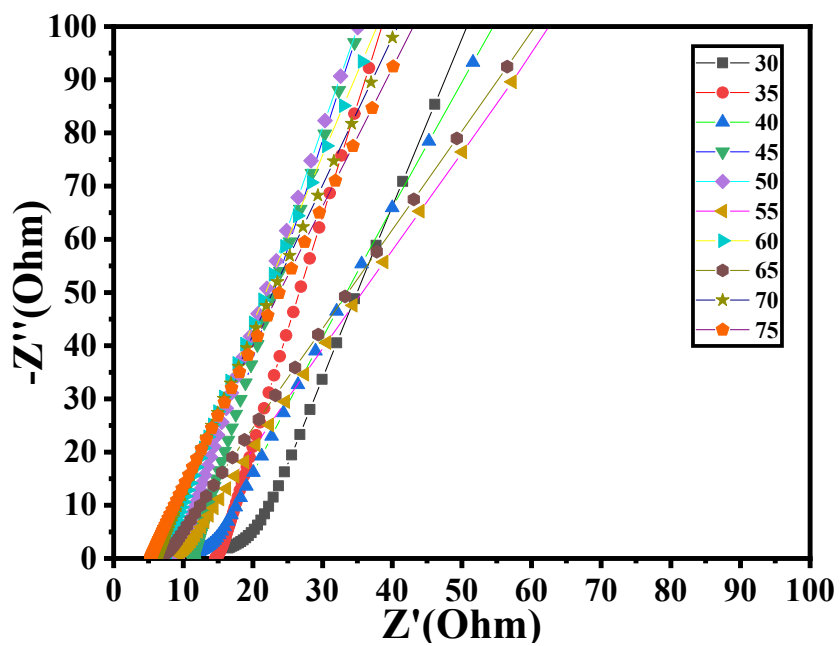

Figure S5: Impedance plot of SPE IL-II at different temperatures

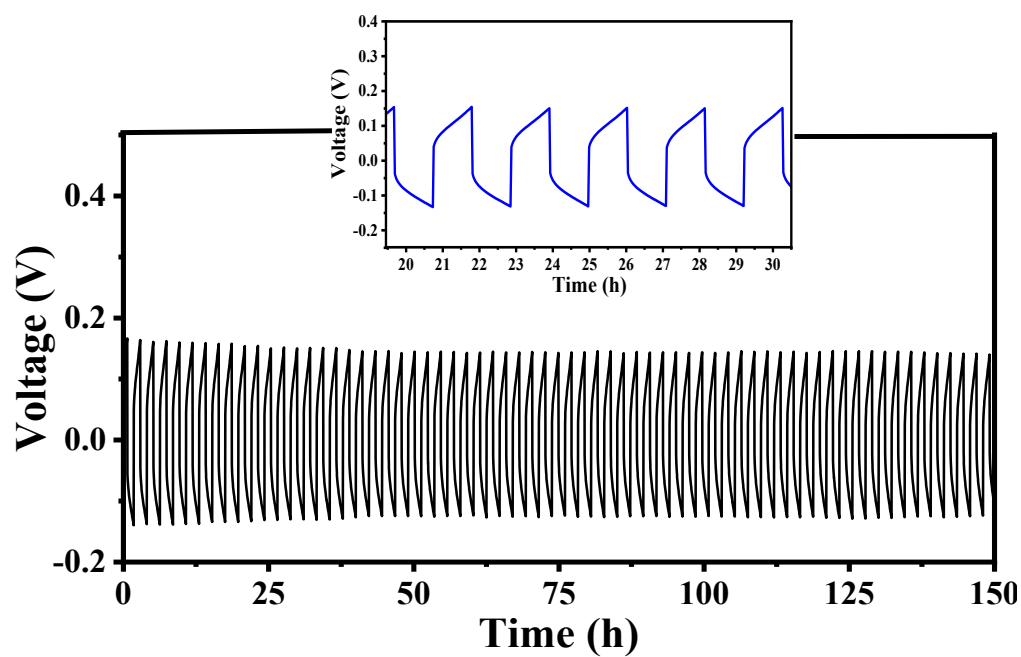

Figure S6: Strip-plate analysis at  $0.1 \text{ mA cm}^{-2}$

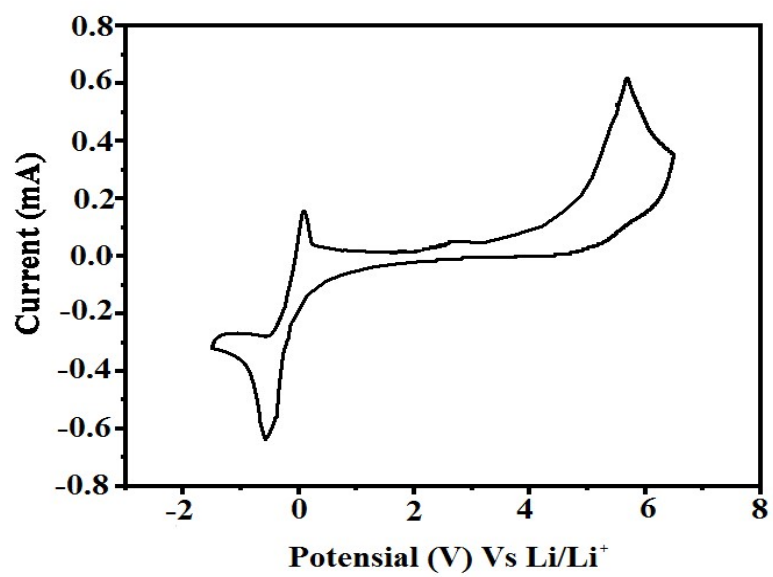

**Figure S7:** Cyclic voltammogram of Li/SPE-IL-II/SS

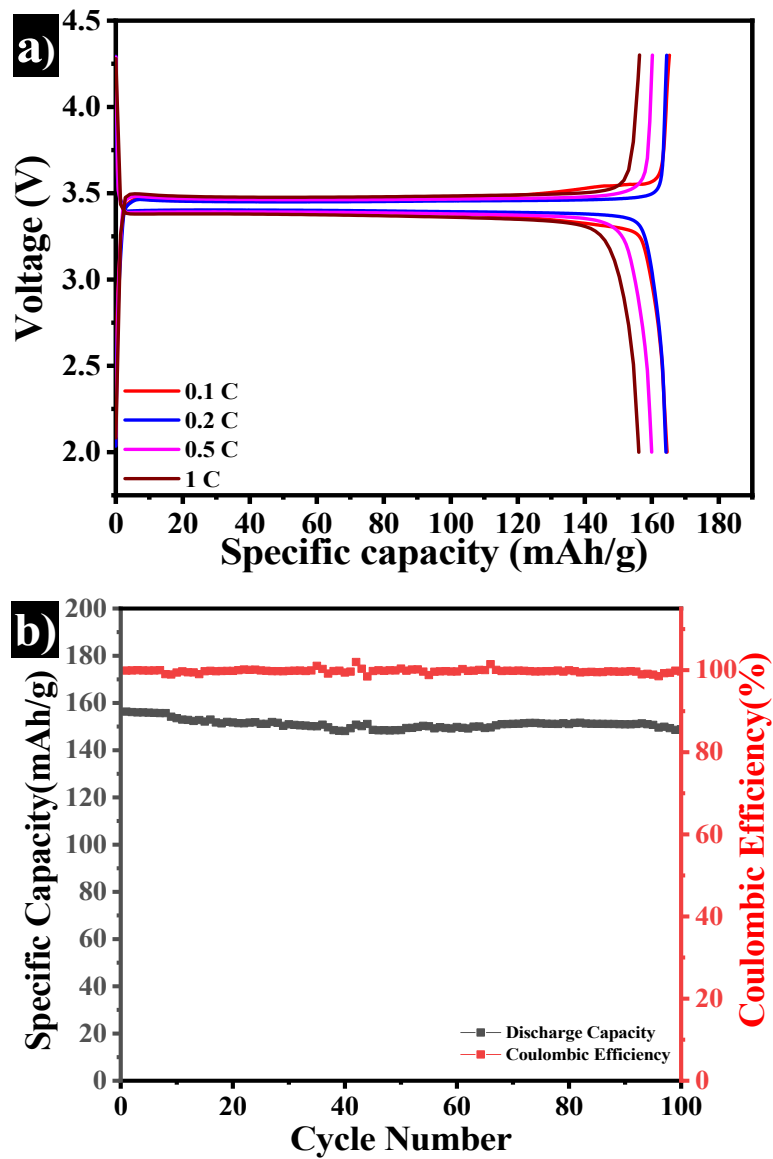

**Figure S8:** a) Galvanostatic charge-discharge of half-cell Li/1M LiPF<sub>6</sub> EC:DMC(1:1v)/LFP at different current densities, b) Discharge capacity and coulombic efficiency at 1C of half-cell Li/1M LiPF<sub>6</sub> EC:DMC(1:1v)/LFP
